# Supplementary material for: Casting light on Asgardarchaeota metabolism in a sunlit microoxic niche
Source: Springer Nature journal article supplement (doi:10.1038/s41564-019-0404-y), 2019-04-01
Supplement: 41564_2019_404_MOESM1_ESM.pdf [file 41564_2019_404_MOESM1_ESM.pdf]

In the format provided by the authors and unedited.

# Casting light on Asgardarchaeota metabolism in a sunlit microoxic niche

Paul-Adrian Bulzu<sup>1,8</sup>, Adrian-Ştefan Andrei<sup>2,8</sup>, Michaela M. Salcher<sup>2,3</sup>, Maliheh Mehrshad<sup>2</sup>, Keiichi Inoue<sup>5</sup>, Hideki Kandori<sup>6</sup>, Oded Beja<sup>4</sup>, Rohit Ghai<sup>2\*</sup> and Horia L. Banciu<sup>1,7</sup>

---

<sup>1</sup>Department of Molecular Biology and Biotechnology, Faculty of Biology and Geology, Babeş-Bolyai University, Cluj-Napoca, Romania. <sup>2</sup>Department of Aquatic Microbial Ecology, Institute of Hydrobiology, Biology Centre of the Academy of Sciences of the Czech Republic, České Budějovice, Czech Republic. <sup>3</sup>Limnological Station, Institute of Plant and Microbial Biology, University of Zurich, Kilchberg, Switzerland. <sup>4</sup>Faculty of Biology, Technion Israel Institute of Technology, Haifa, Israel. <sup>5</sup>The Institute for Solid State Physics, The University of Tokyo, Kashiwa, Japan. <sup>6</sup>Department of Life Science and Applied Chemistry, Nagoya Institute of Technology, Nagoya, Japan. <sup>7</sup>Molecular Biology Center, Institute for Interdisciplinary Research in Bio-Nano-Sciences, Babeş-Bolyai University, Cluj-Napoca, Romania. <sup>8</sup>These authors contributed equally: Paul-Adrian Bulzu, Adrian-Ştefan Andrei. \*e-mail: [ghai.rohit@gmail.com](mailto:ghai.rohit@gmail.com)

## Casting light on Asgardarchaeota metabolism in a sunlit microoxic niche

Paul-Adrian Bulzu<sup>1#</sup>, Adrian-Ştefan Andrei<sup>2#</sup>, Michaela M. Salcher<sup>2,3</sup>, Maliheh Mehrshad<sup>2</sup>,  
Keiichi Inoue<sup>5</sup>, Hideki Kandori<sup>6</sup>, Oded Beja<sup>4</sup>, Rohit Ghai<sup>2\*</sup>, Horia L. Banciu<sup>1,7</sup>

<sup>1</sup>Department of Molecular Biology and Biotechnology, Faculty of Biology and Geology, Babeş-Bolyai University, Cluj-Napoca, Romania

<sup>2</sup> Department of Aquatic Microbial Ecology, Institute of Hydrobiology, Biology Centre of the Academy of Sciences of the Czech Republic, České Budějovice, Czech Republic.

<sup>3</sup>Limnological Station, Institute of Plant and Microbial Biology, University of Zurich, Kilchberg, Switzerland.

<sup>4</sup>Faculty of Biology, Technion Israel Institute of Technology, Haifa, Israel.

<sup>5</sup>The Institute for Solid State Physics, The University of Tokyo, Kashiwa, Japan.

<sup>6</sup>Department of Life Science and Applied Chemistry, Nagoya Institute of Technology, Nagoya, Japan.

<sup>7</sup>Molecular Biology Center, Institute for Interdisciplinary Research in Bio-Nano-Sciences, Babeş-Bolyai University, Cluj-Napoca, Romania.

# These authors contributed equally to this work

\*Corresponding author: Rohit Ghai

Institute of Hydrobiology, Department of Aquatic Microbial Ecology, Biology Centre of the Academy of Sciences of the Czech Republic, Na Sádkách 7, 370 05, České Budějovice, Czech Republic.

Phone: +420 387 775 881

Fax: +420 385 310 248

E-mail: [ghai.rohit@gmail.com](mailto:ghai.rohit@gmail.com)

## **Supplementary Information**

### **Supplementary Discussion**

**Sediment chemical analyses:** The analysis of leachable salt contents of Tekirghiol (0-40cm) and Amara (0-10cm) sediments indicated that the dominant cations and anions ( $\text{g} \cdot \text{kg}^{-1}$ ) were:  $\text{Na}^+$  (16.5 and 7.0),  $\text{K}^+$  (1.0 and 0.22),  $\text{Mg}^{2+}$  (1.1 and 4.0),  $\text{Cl}^-$  (27.7 and 11.2), and  $\text{SO}_4^{2-}$  (0.25 and 13.2) (Supplementary Table 9).

**Environmental distribution of Heimdallarchaeia:** From the 279 sequences available in the SILVA database<sup>1</sup> at the time of writing (October 2018), we infer that the most likely habitat of Heimdallarchaeia is represented by marine and brackish sediments (with scarce reports from water column or microbial mats) in both deep (sediments from: hydrothermal vents, seafloor, cold seeps, etc.) and shallow habitats (sediments from: marshes, mangrove fields and shallow waterbodies).

**Phylogenomics:** The phylogenomic trees (**Figure 1a, b**) showed that the basal branches of Thorarchaeia were represented by MAGs recovered from the Tekirghiol hypersaline sediment (i.e. TEKIR\_14 and TEKIR\_12S). The other ones were shown to form a compact cluster ( $n=8$ ), which appeared to be the outcome of a more recent diversification event (as assessed by short branch lengths) in brackish environments. Thus, the two brackish Amara MAGs (AMARA\_2 and AMARA\_8) clustered together with the: estuarine Mai Po ones (MP8T\_1, MP9T\_1 and MP11T\_1)<sup>2</sup>, Baltic Sea AB\_25<sup>3</sup> and the White Oak River Estuary SMTZ1\_45<sup>3</sup>; forming a genus-level clade (as assessed by amino acid identity values – **Supplementary Table 1 “AAI\_Thorarchaeia”**). Noteworthy, this reduced phylogenomic diversity within Thorarchaeia contrasts with the highly divergent MAGs of Loki- and Heimdallarchaeia, with which it shares common ancestry (**Figure 1a, b**). The presence of the younger RuBisCO type (i.e. IV)<sup>4</sup> (**Supplementary Figure 5**) in Thorarchaeia supports the ‘(more)recent diversification’, as the other Asgardarchaeota (sampled to date) still maintain the ancestral type III (**Supplementary Figure 5**).

The trees generated by Bayesian inference (Figure 1b) and maximum likelihood (ML) (Supplementary Figure 1b) methods recovered the eocyte topology (Eukaryota branching within Asgardarchaeota), even though they failed to confidently resolve the branching point of eukaryotes. We consider that the three-domain topology recovered in a previous study<sup>5</sup> by using ML methods is likely an artifact caused by the long-branch attraction phenomenon, since our phylogenomic trees with SR4 amino acid recoded alignments (used for reducing substitution saturation and compositional heterogeneity) provide high support for the eocyte tree.

**Rhodopsins:** The recently discovered heliorhodopsins (HeR) were reported to be present in Heimdallarchaeia<sup>6</sup>. HeR share low sequence similarities with all known type-1 rhodopsins, and even more remarkably they are oriented in an opposite topology in the membrane, harbouring a cytoplasmic N-terminus (in contrast, type-1 rhodopsins possess extracellular N-terminus). Heimdallarchaeia appear to possess the most diverse collection of rhodopsins within the Asgardarchaeota superphylum at large: type-1, HeR and schizorhodopsins. In contrast Loki- and Thorarchaeia were found to contain only schizorhodopsins (SzR). Lokiarchaeia were found to harbour sequences that have a helix-turn-helix motif and which are similar to bacterioopsin-activator like proteins. These proteins, which were found to be in the proximity of the SzR (**Supplementary Figure 6**) have been previously characterised in *Halobacterium halobium*, where they are hypothesized to work as low oxygen sensors capable of activating the bacteriorhodopsin gene<sup>7</sup>. However, given the absence of the sensing N-terminal domain (NifL-like), the connection between the bacterioopsin-activator like proteins and SzR is unclear. Although, the presence of Asgardarchaeota in habitats with light exposure possibility (e.g. lake water column, estuarine

sediments, mangrove sediments, microbial mats, etc.)<sup>2,3</sup> fulfils the condition needed for rhodopsin usage, additional experimental data is needed to clarify the functions of these proteins.

**Metabolism:** We observed that while all Asgardarchaeota clades (i.e. Thor-, Loki- and Heimdallarchaeia) possess transporters for the uptake of organic compounds, their preferences towards their categories show phyla specificity. We found that the genomic repertoire of Lokiarchaeia is highly enriched (up to ten times in comparison to rest of Asgardarchaeota) in genes encoding for the uptake of modified monosaccharides. Thus, Lokiarchaeia had 5.85 transporters/Mb for the glycoside/pentoside/hexuronide symporters, while Thor- and Heimdallarchaeia barely reached 0.66 and respectively 0.52 transporters/Mb. We reason that this high genomic density is linked to the Lokiarchaeia's inferred capacity to degrade cellulose (by employing the synergic action of: endoglucanases, beta-glucosidases and cellobiose phosphorylases), and to import the resulted monosaccharides into the cytosol. These monosaccharides could be used to fuel the cell machinery (by transformation of glucose to acetyl-CoA or lactate with subsequent ATP production), or transformed into glycogen storage for later usage (through glycogen/starch synthases, 1,4-alpha-glucan branching enzymes; starch/glycogen phosphorylases, alpha-amylases, neopullulanases). Peptide/nickel transporters were found to have a higher density in Thorarchaeia (Thor-: 2.48 transporters/Mb; Heimdall-: 0.79 transporters/Mb; Lokiarchaeia: 0.51 transporters/Mb). As previously reported in Thor-<sup>2,8</sup>, we found that both Loki- and Heimdallarchaeia have the mechanisms involved in peptide and amino-acid uptake, as well as the enzymatic repertoire needed for their degradation to keto-acids and acetyl-CoA (endopeptidases: PepB, PepD, PepP and PepT; aminotransferases: AspB, ArgD, IlvE, GlmS, HisC and PuvE; glutamate dehydrogenases/oxidoreductases). Among Asgardarchaeota, Thorarchaeia was the only phylum in which we found the glucarate and dicarboxylate uptake systems, as well as the metabolic pathways needed to catabolize putrescine to succinate. Inorganic phosphate uptake could be achieved by all Asgardarchaeota through the usage of PiT family transporters. Lokiarchaeia was found to harbor the PhoR-PhoB two component system involved in phosphate uptake regulation, while Heimdallarchaeia (i.e. LC\_2 and RS678) was found to encode ABC-type transporters for phosphonates: refractory forms of phosphorus found to be highly abundant in marine systems<sup>9</sup>.

Sulfur uptake can be accounted for by the presence of sulphate permease SulP in Loki- and Thorarchaeia, as well as the ABC-type sulfonate/nitrate/taurine transport system, predominantly in the latter. Cysteine may also serve as a source of sulfur which can be mobilized by cysteine desulfurases in all three Asgardarchaeota phyla.

Remarkably, two Heimdallarchaeia MAGs (LC\_2 and LC\_3) encoded genes for the synthesis and degradation of cyanophycin (**Figure 3**), a non-ribosomally produced polypeptide used as a carbon and nitrogen storage pool in bacteria<sup>10</sup>.

While a canonical pentose phosphate pathway (PPP) is lacking in all analyzed Asgardarchaeota, evidence indicates that simple sugar interconversions are carried out by the non-oxidative branch of this pathway. In Thorarchaeia, the xylulose part of the non-oxidative branch was found to be largely complete with the key enzyme transketolase present in multiple MAGs. We also identified two copies of this enzyme in Heimdall\_RS678, which points towards similar functional capabilities; however, with low support within the Heimdallarchaeia phylum itself. The absence of transketolase enzyme, in Loki- as well as in most Heimdallarchaeia, and the presence of components of the Ribulose Monophosphate Pathway (RuMP) indicates it as a potential alternative for PPP, as previously reported in the case of *Thermococcus kodakaraensis*<sup>11</sup>. The presence of uridine phosphorylase within all three analyzed phyla indicates that the nucleotide degradation pathways could serve as an additional ribose source. While all analyzed Asgardarchaeota phyla encode components of the glycolytic pathway (i.e. type Embden-Meyerhof-Parnas), three Heimdallarchaeia MAGs (LC\_3, AB\_125 and AMARA\_4) were found to employ non-canonical ADP-dependent kinases

and, as previously noted<sup>2</sup>, no glucokinase homologue could be identified in Thorarchaeia. We reason that the well represented non-oxidative PPP in this group could either represent an alternative point of entry for sugars in the EMP, or that the function of canonical glucokinase is achieved by yet unidentified archaea-specific sugar kinases<sup>12</sup>.

Regarding pyruvate metabolism, in both Loki- and Thorarchaeia phosphoenolpyruvate (PEP) can be converted to pyruvate by phosphoenolpyruvate synthase (pps) as well as pyruvate kinase (pyk), the latter of which we identified in Heimdallarchaeia as well. Also present in all three phyla, malic enzyme (maeA) is probably responsible for catalyzing the oxidative decarboxylation of malate to pyruvate, CO<sub>2</sub> and NADH. Additionally, all groups encode pyruvate phosphate dikinase (PPDK), a P<sub>i</sub>-utilizing enzyme which interconverts PEP and pyruvate. Among the anaplerotic reactions for CO<sub>2</sub> fixation, reversible carboxylation of acetyl-CoA to pyruvate may be achieved in all groups by the activity of pyruvate:ferredoxin oxidoreductase (PFOR). PEP can be synthesized by the phosphoenolpyruvate carboxykinases (PEPCK) present in all three groups, starting from oxaloacetate. Therefore, under gluconeogenic conditions, maeA and/or PEPCK, in combination with pps/PPDK, is used for directing C4 carbon intermediates from the TCA cycle, when present, to PEP<sup>13</sup> - the precursor for gluconeogenesis. Noteworthy, as a hint of potential aerobiosis, we identified exclusively in Heimdallarchaeia MAGs (LC2 and LC3) genes encoding for pyruvate oxidase (poxL), which catalyzes the decarboxylation of pyruvate in the presence of phosphate and oxygen, yielding carbon dioxide, hydrogen peroxide and acetyl phosphate<sup>14</sup>.

Among all analyzed phyla, the complete TCA cycle was identified in Loki- and Heimdallarchaeia. Inquiringly, genomes from all three phyla, with the exception of Heimdall LC\_3, were found to lack the membrane anchoring subunits of succinate dehydrogenase (sdhC, sdhD), while Lokiarchaeia contain key genes (isocitrate dehydrogenase, 2-oxoglutarate-ferredoxin oxidoreductase, ATP-citrate lyase) that are indicative of a reductive TCA cycle, involved in the autotrophic fixation of CO<sub>2</sub>. Also, malate dehydrogenase (MDH) was identified in Loki- and Thorarchaeia only by homology search (COG2055) and 3-dimensional structure predictions<sup>15</sup>.

Through analyzing Asgardarchaeota genomes assembled in this study, we confirm previous findings<sup>2,16</sup> regarding the presence of a complete Wood-Ljungdahl pathway in both Loki- and Thorarchaeia. This pathway was found absent in the partial TEKIR\_3 and AMARA\_4 (13 and respectively 30% CheckM<sup>17</sup> estimated completeness) MAGs, as well as in the previously published (AB\_125, LC\_2, LC\_3, RS678) Heimdallarchaeia ones. Importantly, the Wood-Ljungdahl pathway is confined to anoxic niches harboring low reducing substrates such as carbon monoxide (CO) and H<sub>2</sub><sup>18,19</sup>. In spite of the fact that in anaerobic as well as aerobic microbes, CO may be used as both energy and carbon source<sup>20</sup>, the ability to utilize CO is conditioned by the presence of enzyme complexes known as carbon monoxide dehydrogenases (CODHs)<sup>21</sup>. In Heimdallarchaeia, we identified all three major subunits of the aerobic type CODH (coxSML). In this case, electrons generated from CO oxidation may be shuttled to oxygen or nitrate, which may serve as final electron acceptors<sup>22-24</sup>. However we observe that Thor- and Lokiarchaeia encode all components of the bifunctional and oxygen-sensitive<sup>25</sup> enzyme complex known as carbon monoxide dehydrogenase/acetyl-CoA synthase (CODH/ACS). This complex is part of the Wood-Ljungdahl pathway and is responsible for catalyzing reactions involved in autotrophic fixation of CO<sub>2</sub>.

Regarding oxidative phosphorylation, while V/A-type ATPase appears mostly complete in Loki- and Thorarchaeia, the other components involved in oxidative phosphorylation (the electron transport chain), are missing or incomplete, emphasizing anaerobic lifestyles. For Heimdallarchaeia we could identify complete V/A-type ATPase, succinate dehydrogenase, almost complete NADH:quinone oxidoreductase and importantly – cytochrome c oxidase – another hallmark of aerobiosis.

Uniquely among known Archaea, we identify all components of the aerobic tryptophan degradation pathway (i.e. kynurenine pathway<sup>26</sup>) in three published Heimdallarchaeia genomes (LC\_2, LC\_3,

RS678). The performed evolutionary history inferences indicated that the kynurenine pathway was probably acquired by Heimdallarchaeia ancestor through lateral gene transfer from bacteria (**Supplementary Figure 3**). The phylogenetic trees, constructed with key enzymes of the pathway, pointed towards enzyme-specific evolutionary rates (**Supplementary Figure 3**). Thus, while Heimdallarchaeia MAGs formed monophyletic clusters in the dioxygenases trees (TDO, HAAO), in the kynurenine monooxygenase (KMO) one they segregated into two independent clusters. The MAG Heimdall\_LC\_3 showed an affinity to cluster with a sediment-dwelling Bacteroidetes (with low statistical support).

Among Asgardarchaeota, the Heimdallarchaeia were found to possess genes encoding for sulfide:quinone oxidoreductases, enzymes used in sulfide detoxification and energy generation *via* quinone pool reduction (**Figure 3**). As sulfide binds to cytochrome c oxidase and inhibits aerobic respiration<sup>27</sup>, the presence of these enzymes in Heimdallarchaeia could point towards a detoxification role. The fact that one Heimdallarchaeia MAG described in this study (i.e. AMARA\_4) had the sulfide:quinone oxidoreductase gene and the other MAGs recovered from the same sample did not (i.e. 7 Loki- and 3 Thorarchaeia MAGs), suggests that the highly lipophilic sulfide does not interfere with the aerobic metabolism, nor is it part of a conserved energy generation strategy in Asgardarchaeota. The superoxide dismutase, catalases, and glutathione peroxidases found in Heimdallarchaeia may act in alleviating the oxidative damage generated by a facultative aerobic metabolism.

In Heimdallarchaeia the following archaeellum<sup>28</sup> components were identified: flaG, flaI, flaJ, flaK, flaH and a homolog of the archaeal flagellin (IPR013373). The presence of sensory methyl-accepting chemotaxis proteins (MCPs), together with a complete chemotaxis signal transduction pathway (CheA, B, C, D, R, W, Y), suggests that Heimdallarchaeia may be motile.

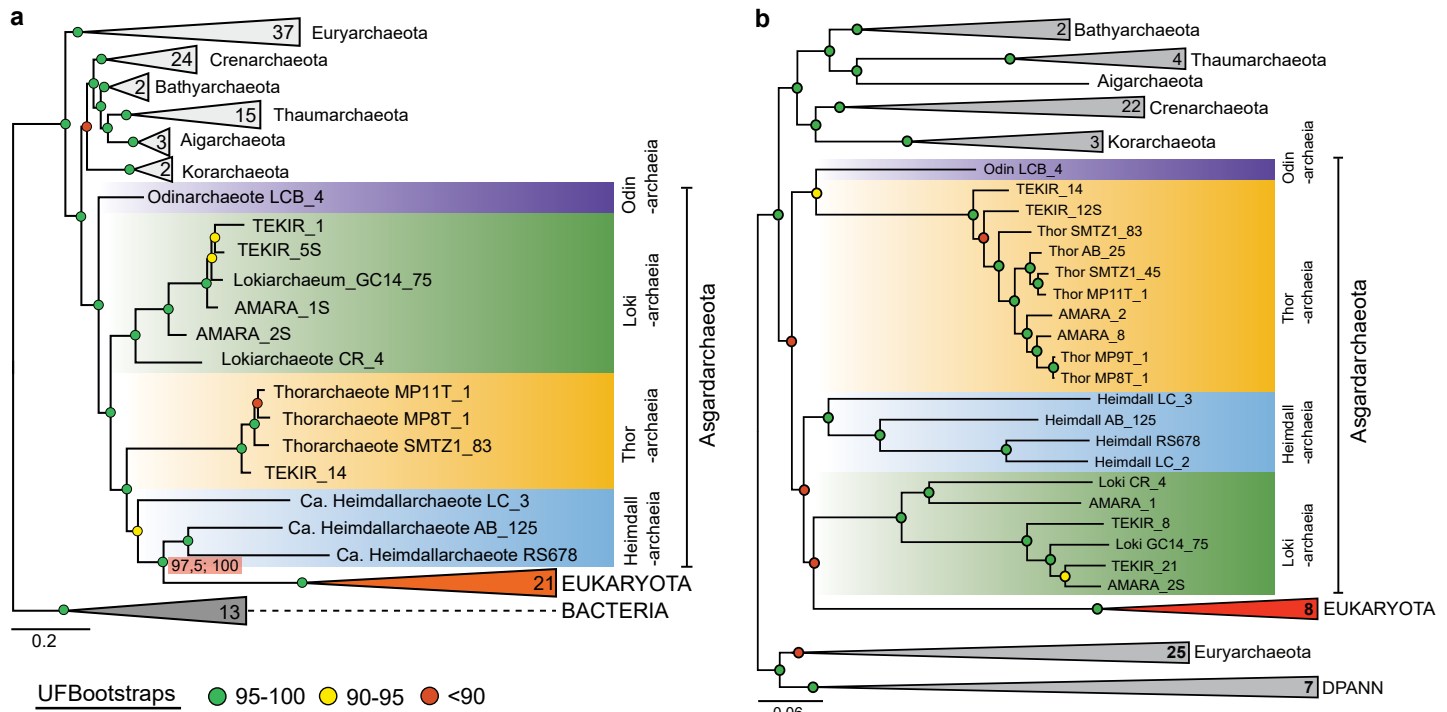

**Supplementary Figure 1. Maximum likelihood (ML) inferences of Asgardarchaeota phylogeny.**

**a**, ML phylogeny (GTR+I+G4, general time reversible model of nucleotide substitution) of concatenated SSU+LSU gene sequences spanning all domains of life (n=97 archaeal, n=21 eukaryotic, n=13 bacterial lineages; details in Supplementary Table 6). The red rectangle indicates the results of the Shimodaira-Hasegawa test and ultrafast bootstrapping for the Eukaryota/Heimdallarchaeia cluster. **b**, ML phylogenomic tree (C60SR4, 60-profile protein models of amino acid substitution with SR4 recoding) based on 48 ribosomal proteins (Supplementary Table 7) including 85 archaeal and 8 eukaryotic lineages (Supplementary Table 6). UFBootstrap values are indicated by colored circles (legend in the lower-left part of the figure). The scale bars indicate number of substitutions per site.

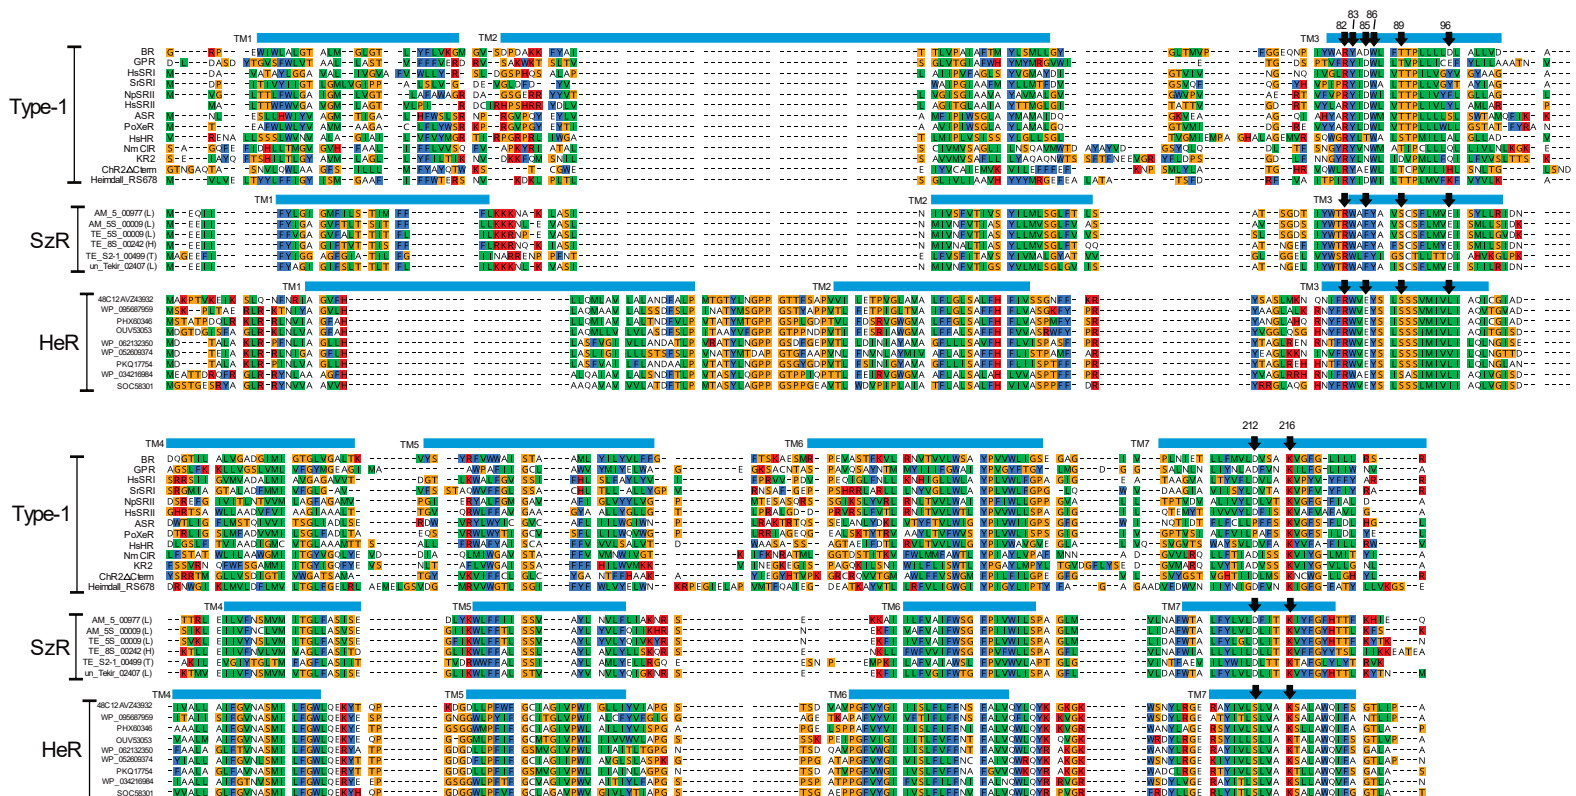

**Supplementary Figure 2. Multiple alignment of type-1, schizorhodopsins (SzR) and heliorhodopsins (HeR).**

Transmembrane helices (labeled as TM1-7) are shown for the first sequence of each group at the top. Sequences of type-1 rhodopsins are - bacteriorhodopsin (BR), green absorbing proteorhodopsin (GPR), sensory rhodopsin I from *Halobacterium salinarum* (HsSRI) and *Salinibacter ruber* (SrSRI), sensory rhodopsin II from *Natronomonas pharaonis* (NpSRII) and *H. salinarum* (HsSRII), *Anabaena* sensory rhodopsin (ASR), xenorhodopsin from *Parvularcula oceani* (PoXeR), halorhodopsin from *H. salinarum* (HsHR), chloride-pumping rhodopsin from *Nonlabens marinus* (NmCIR), sodium-pumping rhodopsin from *Krokinobacter eikastus* (KR2), and cation channelrhodopsin-2 from *Chlamydomonas reinhardtii* (C-terminal side omitted, ChR2  $\Delta$ C-term) and putative proton pump from *Heimdallarchaeota* RS678 MAG assembled from a Red Sea metagenome. Sequences of Asgardarchaeota schizorhodopsins: Six sequences are shown, the number in brackets indicates taxonomic affiliation of the metagenome assembled genome- L – Lokiarchaeia, H – Heimdallarchaeia and T – Thorarchaeia. Sequences of heliorhodopsins are – 48C12: original actinobacterial fosmid clone from Lake Kinneret, WP\_095687959: freshwater actinobacterium *Ca. Nanopelagicus abundans*, PHX60346: Actinobacteria bacterium (Lake Baikal metagenome), OUV53053: Actinomycetales bacterium TMED115 (marine metagenome), WP\_062132350 *Demequina aestuarii*, WP\_052609374: freshwater Actinobacteria bacterium IMCC26256, PKQ17754: Actinobacteria bacterium HGW-Actinobacteria-8 (groundwater metagenome) WP\_034216984: Actinoplanes *subtropicus*, SOC58301: *Ornithinimicrobium pekingense*. In all groups the functionally important positions 82, 83, 85, 86, 89, 96, 212 and 216 (bacteriorhodopsin numbering) are marked with black arrows.



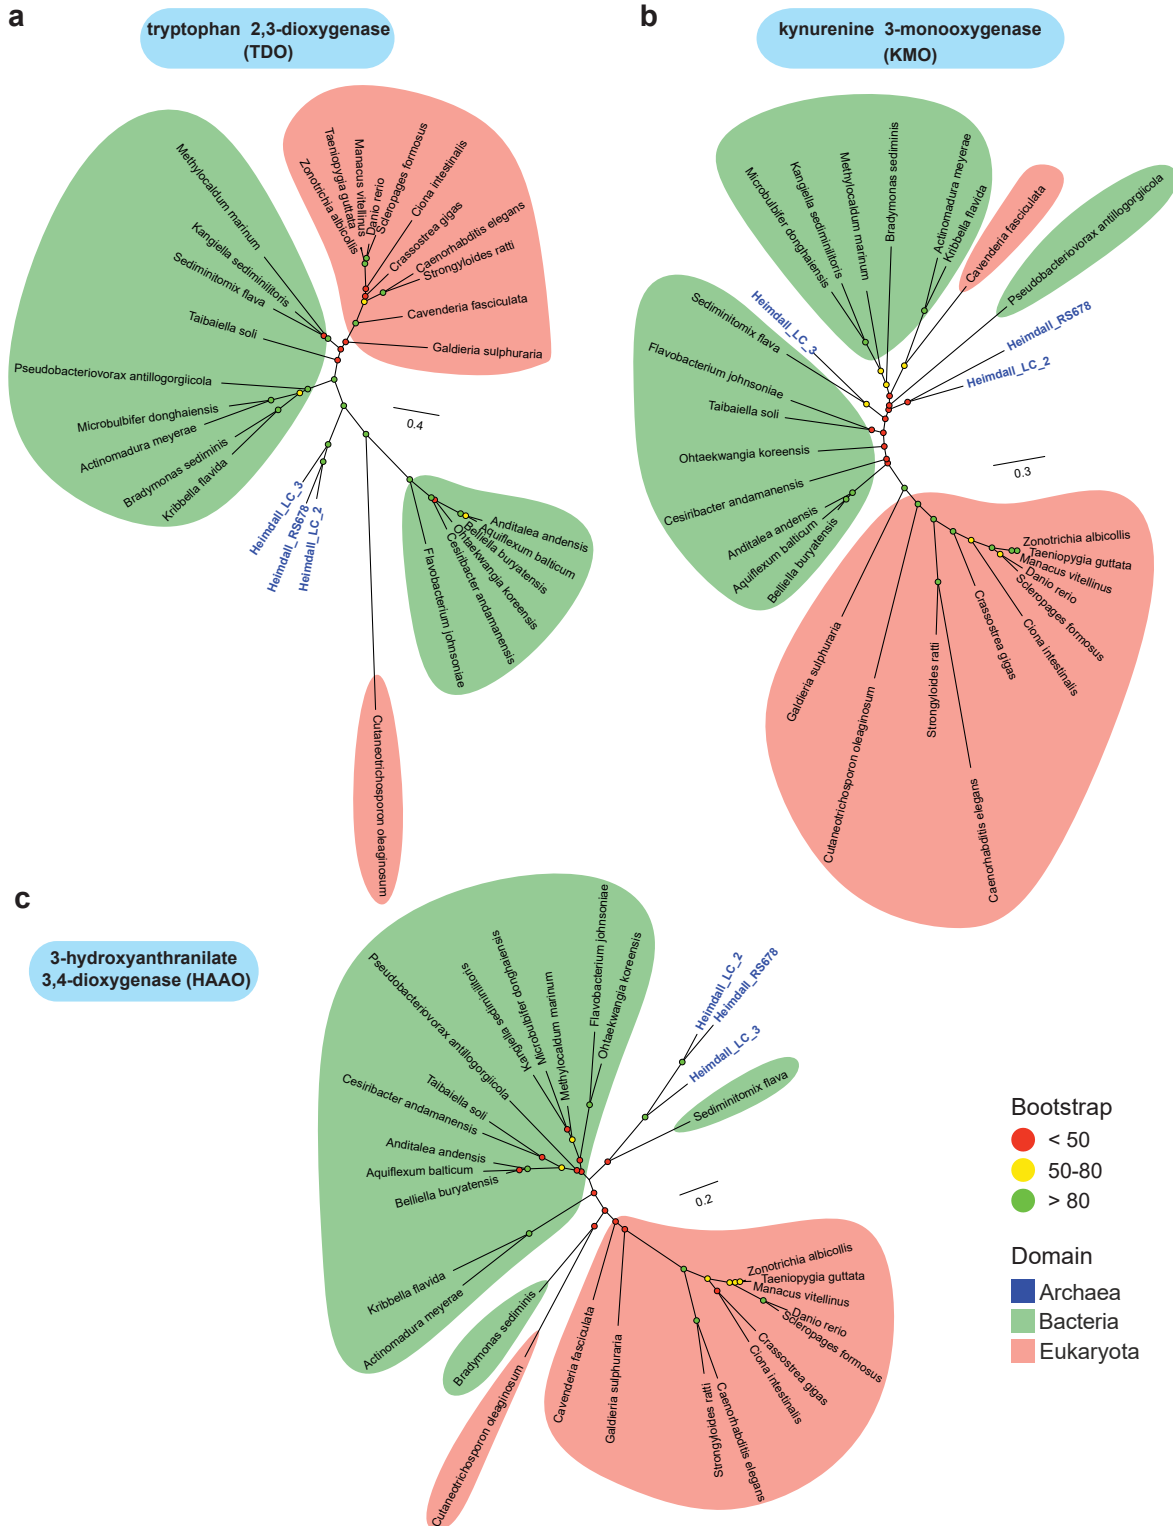

**Supplementary Figure 3. Maximum likelihood phylogenetic trees of key enzymes of the kynurenine pathway.** **a**, tryptophan 2,3-dioxygenase, **b**, kynurenine 3-monooxygenase and **c**, 3-hydroxyanthranilate 3,4-dioxygenase, respectively. Standard bootstrap values are indicated by colored circles (legend in the lower-right part of the figure). The names of Heimdallarchaeia MAGs are highlighted in blue. Along with sequences recovered from Heimdallarchaeia MAGs (Heimdall\_LC\_2, Heimdall\_LC\_3, Heimdall\_RS678), enzymes identified in bacterial (n=15) and eukaryotic (n=12) lineages harbouring the complete kynurenine pathway were employed for phylogenetic inferences. Sequence accession numbers and taxonomy for enzymes are presented in Supplementary Table 8.

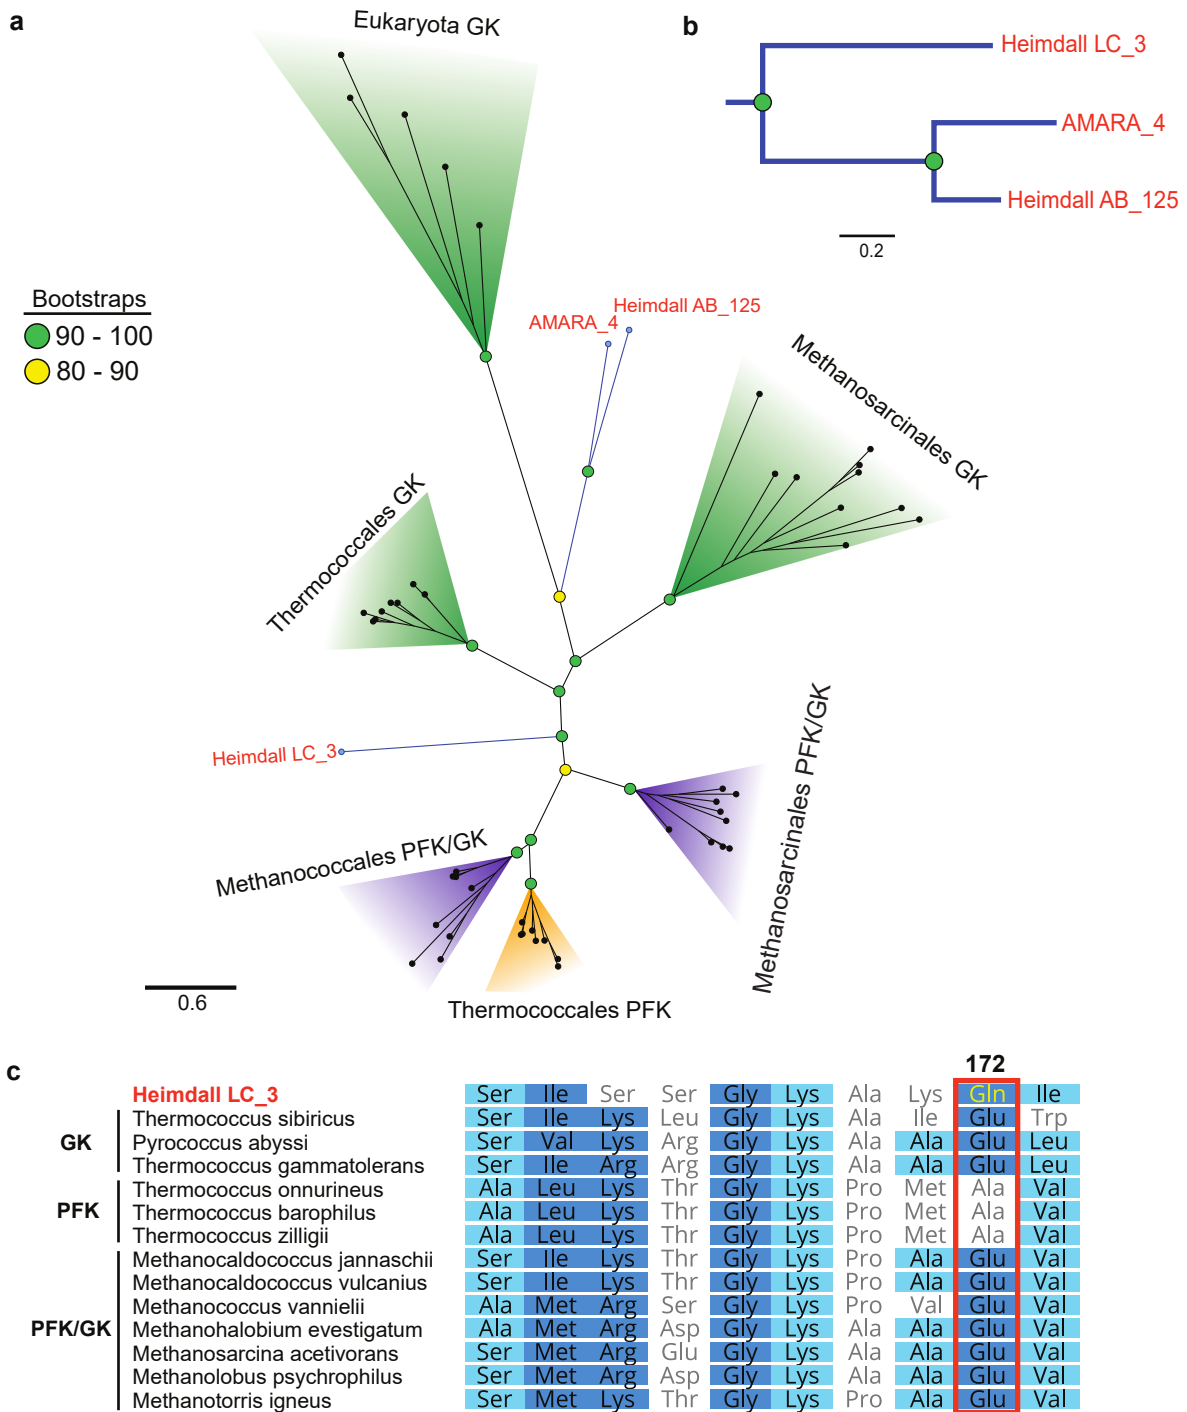

**Supplementary Figure 4. Particular sugar kinases encoded in Heimdallarchaeia.** **a**, ML phylogenetic tree of the ADP-dependent kinases family in Archaea and Eukaryota. The branches belonging to Heimdallarchaeia are colored in blue. The colored panels highlight clades with: glucokinase activity-green, phosphofructokinase activity -orange, and both gluco- and phosphofructokinase activity-purple. Sequences retrieved from the 3 Heimdallarchaeia MAGs (AMARA\_4, Heimdall\_AB\_125, Heimdall\_LC\_3) were used with other sugar kinase sequences (n=49) listed in a previous study (Castro-Fernandez et al., 2017<sup>29</sup>, in Supplementary Table S5). **b**, ML-based phylogenomic subtree showing Heimdall\_LC\_3 MAG as the oldest within the ones harboring ADP-dependent kinases. The scale bars indicate number of substitutions per site. Standard bootstrap values are indicated by colored circles (legend shown). **c**, Sequence alignment of ADP-dependent kinases highlighting the functionally important position 172, as inferred from Castro-Fernandez et al. (2017)<sup>29</sup>. The similarity-coloring scheme is based on the BLOSUM62 matrix.

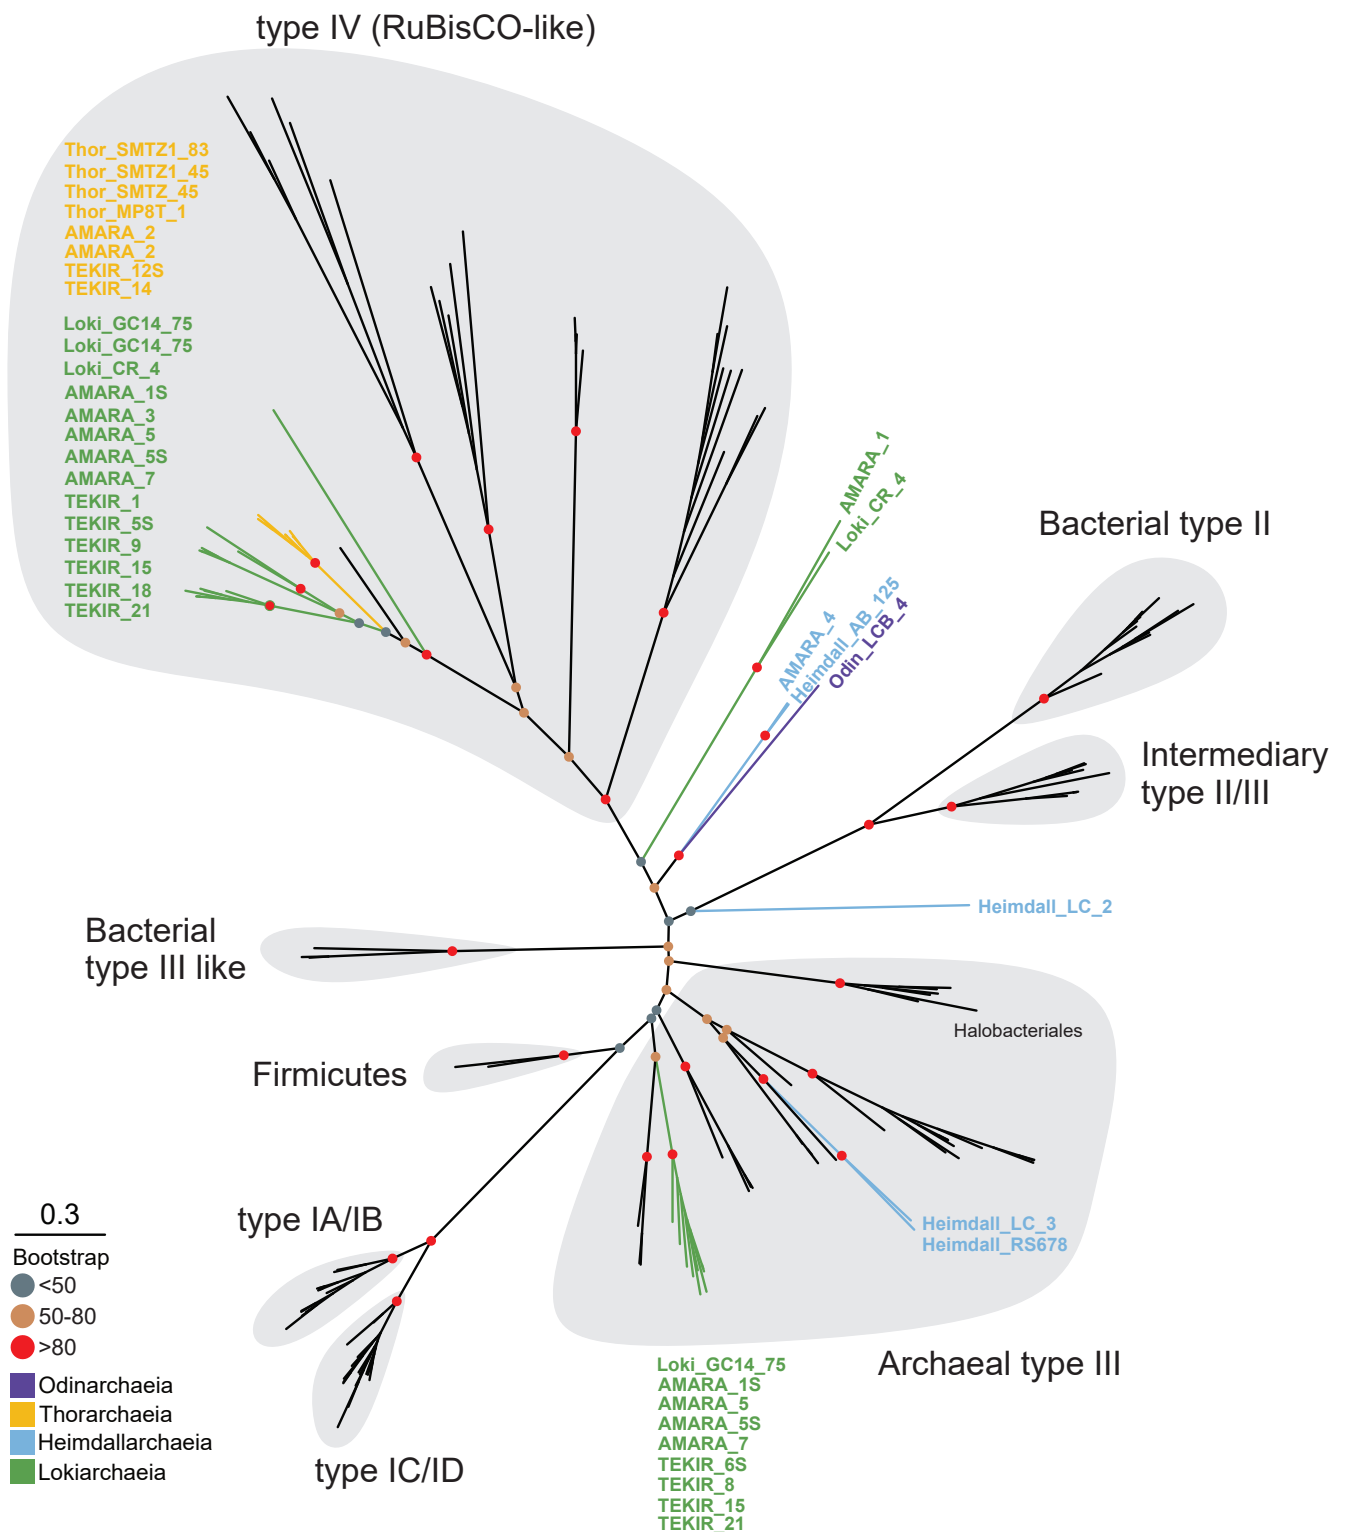

**Supplementary Figure 5. Maximum likelihood tree of the large subunit of RuBisCO (types I-III) and RuBisCO-like (type IV) (*rbcl*, K01601) protein sequences (n=146) of bacterial and archaeal taxa.** Reference sequences were chosen based on previous trees constructed by Tabita et al. 2007<sup>4</sup> and Wrighton et al. 2016<sup>30</sup>. The branches representing the members of Asgardarchaeota superphylum are colored based on their affiliated phylum (legends on the bottom left). The scale bar indicates the amino acid substitutions per site.

**Lokiarchaeaia**

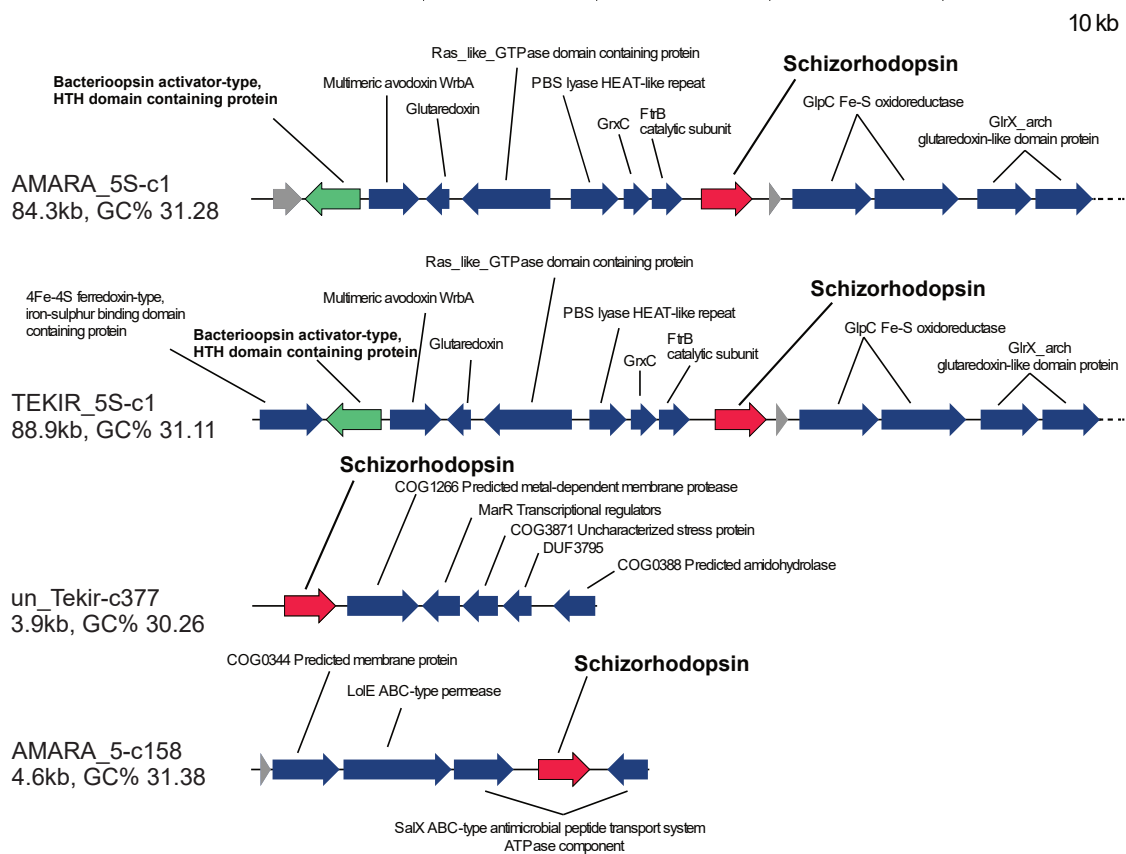

**Thorarchaeaia**

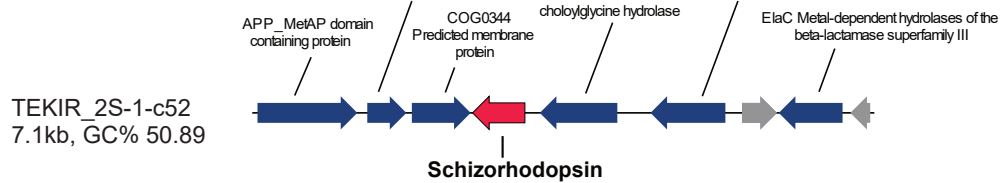

**Heimdallarchaeaia**

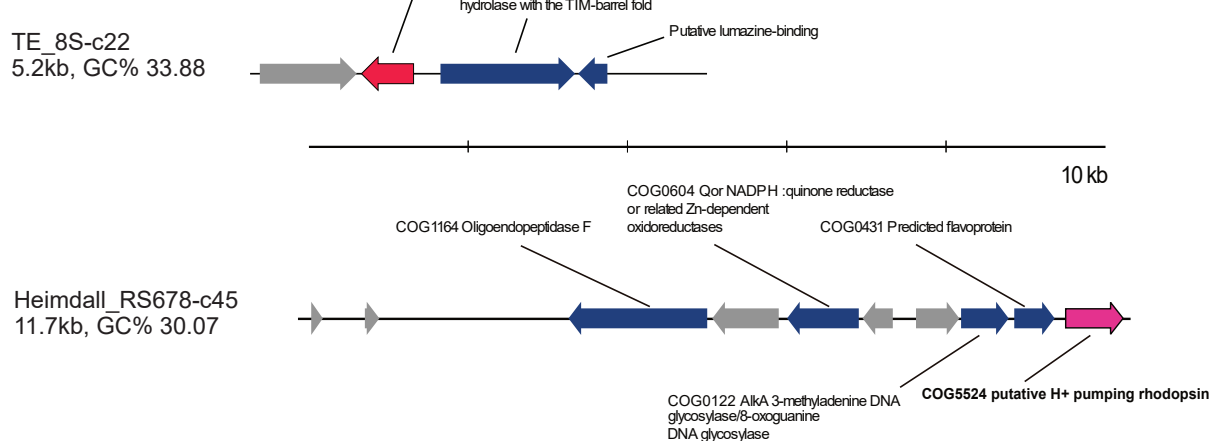

**Supplementary Figure 6. Genomic context of rhodopsins in Asgardarchaeota MAGs.**

Schizorhodopsins are shown in red, bacterioopsin activator-like protein in green, bacteriorhodopsin in purple and the hypothetical proteins in grey. Contigs TE\_8S-c22 and un\_Tekir-c377 were deposited separately in NCBI GenBank with accession numbers MK463862 and MK463863, respectively. 10 kb scale bars are shown at the top of each category of rhodopsins.

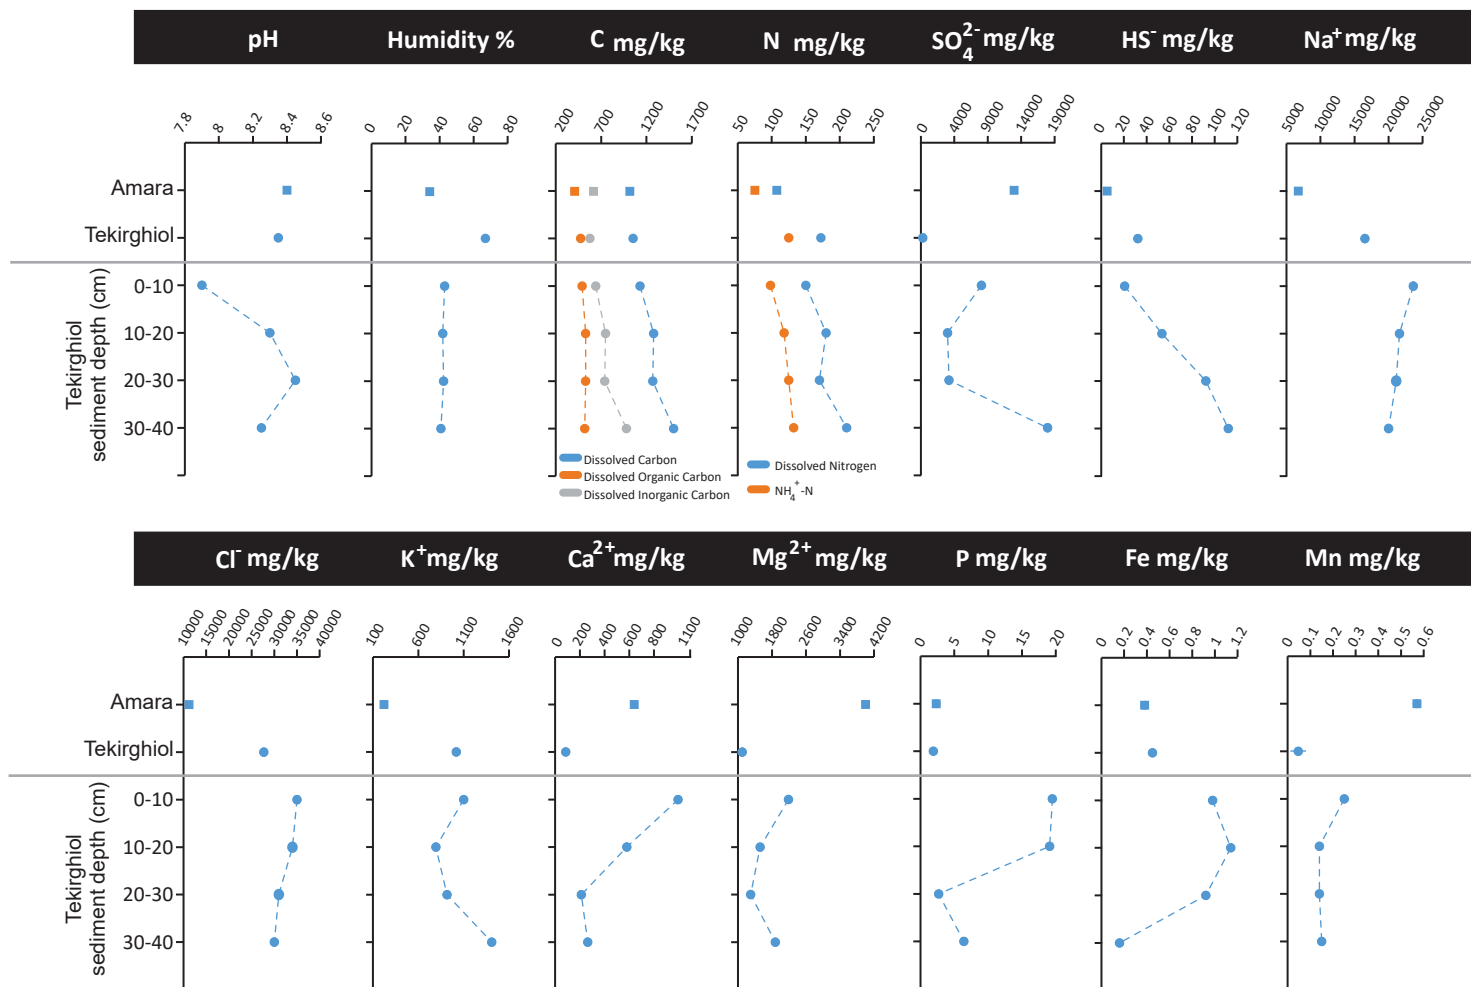

**Supplementary Figure 7. Chemical analyses of the Amara and Tekirghiol sediment samples.**

Mineral concentrations are measured as water-extractable compounds from wet sediments and are reported in  $\text{mg kg}^{-1}$ . The reported data are the mean values of three sub-samples analysed in parallel from each sediment sample. Relative expanded measurement uncertainty (Ue) was calculated according to the International Organization for Standardization (ISO) - Guide to the Expression of Uncertainty in Measurement (GUM) using a coverage factor (k) of 2 ( $k=2$ ), equivalent to a confidence of  $\sim 95\%$ . Ue ranged from 3.6% to 11% depending on the compound as follows: 4.8% for  $\text{Na}^+$ , 5.1% for  $\text{K}^+$ , 3.6% for  $\text{Ca}^{2+}$ , 3.8% for  $\text{Mg}^{2+}$ , 4.9 % for Fe, 4.4% for Mn, 6.2% for P determined by ICP-OES, 4.7% for sulphate ( $\text{SO}_4^{2-}$ ) determined by ion-chromatography, 7.6% for total sulphides ( $\text{HS}^-$ ) and 6.8% for ammonium ( $\text{NH}_4^+$ ) determined by UV-VIS spectrometry, 11% for  $\text{Cl}^-$  by titrimetry, 9.0% for total dissolved carbon, 10.4% for dissolved inorganic carbon and 8.7% for dissolved nitrogen determined by TOC/TN Analyser.

**Supplementary Table 2.** List of Asgardarchaeota genome assemblies downloaded from the NCBI genomes repository (<https://www.ncbi.nlm.nih.gov/genome>) for this study.

| NCBI tax. ID | Organism name         | Isolate  | GenBank Assembly Accession | Isolation source                                  |
|--------------|-----------------------|----------|----------------------------|---------------------------------------------------|
| 2026747      | Ca. Heimdallarchaeota | RS678    | GCA_002728275.1            | Marine water sample                               |
| 1841596      | Ca. Heimdallarchaeota | AB_125   | GCA_001940755.1            | Marine sediment                                   |
| 1841597      | Ca. Heimdallarchaeota | LC_2     | GCA_001940725.1            | Hydrothermal vent sediment                        |
| 1841598      | Ca. Heimdallarchaeota | LC_3     | GCA_001940645.1            | Hydrothermal vent sediment                        |
| 1849166      | Ca. Lokiarchaeota     | CR_4     | GCA_001940655.1            | Terrestrial subsurface sediment                   |
| 1538547      | Lokiarchaeum sp.      | GC14_75  | GCA_000986845.1            | Hydrothermal vent sediment                        |
| 1841599      | Ca. Odinararchaeota   | LCB_4    | GCA_001940665.1            | Hot spring                                        |
| 1837170      | Ca. Thorarchaeota     | AB_25    | GCA_001940705.1            | Marine sediment                                   |
| 1969372      | Ca. Thorarchaeota     | MP11T_1  | GCA_002825515.1            | Mangrove wetland sediments                        |
| 1969370      | Ca. Thorarchaeota     | MP8T_1   | GCA_002825465.1            |                                                   |
| 1969371      | Ca. Thorarchaeota     | MP9T_1   | GCA_002825535.1            |                                                   |
| 1706443      | Ca. Thorarchaeota     | SMTZ-45  | GCA_001563465.1            | Sulfate-methane transition zone estuary sediments |
| 1706444      | Ca. Thorarchaeota     | SMTZ1-45 | GCA_001563335.1            |                                                   |
| 1706445      | Ca. Thorarchaeota     | SMTZ1-83 | GCA_001563325.1            | 16-26 cm                                          |

**Supplementary Table 5.** Accession numbers list for INTERPRO (IPR) domains, COGs (Cluster of Orthologous Groups) and UniProtKB protein sequences used to identify potential Eukaryotic Signature Proteins in Asgardarchaeota MAGs. Particularly, the first ESP (1\*) was identified by local scanning in MAGs with BLASTP using human sequences downloaded from UNIPROT (<https://www.uniprot.org/>).

| Nr. crt. | Description                                        | IPR domain/COG/UniProtKB                       |
|----------|----------------------------------------------------|------------------------------------------------|
| 1*       | DNA polymerase, $\epsilon$ -like catalytic subunit | Q59EA9, Q9UNF3, Q9Y5S5, Q07864, Q9Y5S4, F5H1D6 |
| 2        | Topoisomerase IB                                   | arCOG08649, COG3569                            |
| 3        | RNA polymerase, subunit G (rpb8)                   | IPR031555                                      |
| 4        | Ribosomal protein L22e                             | IPR002671                                      |
| 5        | Ribosomal protein L28e/Mak16                       | IPR029004                                      |
| 6        | Tubulins                                           | IPR000217                                      |
| 7        | Actin family (divergent)                           | IPR004000                                      |
| 8        | Actin/actin-like conserved site                    | IPR020902                                      |
| 9        | Arp2/3 complex subunit 2/4                         | IPR008384                                      |
| 10       | Gelsolin-domain protein                            | IPR007122                                      |
| 11       | Profilin                                           | IPR036140                                      |
| 12       | ESCRT-I: Vps28-like                                | IPR007143                                      |
| 13       | ESCRT-I: steadiness box domain                     | IPR017916                                      |
| 14       | ESCRT-II: EAP30 domain                             | IPR007286                                      |
| 15       | ESCRT-II: Vps25-like                               | IPR014041 and IPR008570                        |
| 16       | ESCRTIII: Vps2/24/46-like                          | IPR005024                                      |
| 17       | Ubiquitin-domain protein                           | IPR000626                                      |
| 18       | E2-like ubiquitin conjugating protein              | IPR000688                                      |
| 19       | E3 UFM1-protein ligase 1                           | IPR018611                                      |
| 20       | RAG-type GTPase domain                             | IPR006762                                      |
| 21       | Longin-domain protein                              | IPR011012                                      |
| 22       | Vacuolar fusion protein Mon1                       | IPR004353                                      |
| 23       | RLC7 roadblock domain protein                      | IPR004942                                      |
| 24       | TRAPP-domain protein                               | IPR007194                                      |
| 25       | Zinc finger, Sec23/Sec24-type                      | IPR006896                                      |
| 26       | Arrestin-like proteins (C-terminal)                | IPR011021                                      |
| 27       | Vesicle coat complex COPII sub. SEC24/SFB2/SFB3    | COG5028                                        |
| 28       | Folliculin (N-terminal)                            | IPR037520                                      |
| 29       | Ribophorin I                                       | IPR007676                                      |
| 30       | Oligosaccharyl transf. OST3/OST6                   | IPR021149                                      |
| 31       | Oligosaccharyl transf. STT32                       | IPR003674                                      |
| 32       | Ezrin/radixin/moesin C-terminal domain             | IPR011259                                      |
| 33       | active zone protein ELKS                           | IPR019323                                      |





**Supplementary Table 8.** Protein RefSeq accession numbers for amino acid sequences used in phylogenetic inferences for key components of the Tryptophan degradation pathway (kynurenine pathway) in Heimdallarchaea.

| Organism name                                | NCBI TaxID | Domain    | tryptophan<br>2,3-dioxygenase<br>(TDO) | kynurenine<br>3-monooxygenase<br>(KMO) | 3-hydroxyanthranilate<br>3,4-dioxygenase<br>(HAAO) |
|----------------------------------------------|------------|-----------|----------------------------------------|----------------------------------------|----------------------------------------------------|
| <i>Actinomadura meyeriae</i>                 | 240840     | Bacteria  | WP_089326016.1                         | WP_089325941.1                         | WP_089327247.1                                     |
| <i>Kribbella flavida</i>                     | 479435     | Bacteria  | WP_012919326.1                         | WP_012923059.1                         | WP_012923056.1                                     |
| <i>Sediminitomix flava</i>                   | 379075     | Bacteria  | WP_109616529.1                         | WP_109618774.1                         | WP_109618766.1                                     |
| <i>Taibaiella soli</i>                       | 1649169    | Bacteria  | WP_111000080.1                         | WP_110999730.1                         | WP_110997529.1                                     |
| <i>Belliella buryatensis</i>                 | 1500549    | Bacteria  | WP_089238736.1                         | WP_089240074.1                         | WP_089240078.1                                     |
| <i>Aquiflexum balticum</i>                   | 758820     | Bacteria  | WP_084121451.1                         | WP_084119369.1                         | WP_084119395.1                                     |
| <i>Anditalea andensis</i>                    | 1048983    | Bacteria  | WP_035073830.1                         | WP_035075278.1                         | WP_035075279.1                                     |
| <i>Cesiribacter andamanensis</i>             | 1279009    | Bacteria  | WP_009196574.1                         | WP_009197406.1                         | WP_009197408.1                                     |
| <i>Ohtaekwangia koreensis</i>                | 688867     | Bacteria  | WP_079686329.1                         | WP_079684767.1                         | WP_079684770.1                                     |
| <i>Flavobacterium johnsoniae</i>             | 376686     | Bacteria  | WP_012022820.1                         | WP_012022586.1                         | WP_012023303.1                                     |
| <i>Kangiella sediminilitoris</i>             | 1144748    | Bacteria  | WP_068990479.1                         | WP_068993461.1                         | WP_068993449.1                                     |
| <i>Methylocaldum marinum</i>                 | 1432792    | Bacteria  | BBA35597.1                             | BBA35436.1                             | BBA35441.1                                         |
| <i>Microbulbifer donghaiensis</i>            | 494016     | Bacteria  | WP_073275402.1                         | WP_073275006.1                         | WP_073275000.1                                     |
| <i>Pseudobacteriovorax antillogorgiicola</i> | 1513793    | Bacteria  | SMF46342.1                             | SMF59929.1                             | SMF59911.1                                         |
| <i>Bradymonas sediminis</i>                  | 1548548    | Bacteria  | WP_111337759.1                         | WP_111332768.1                         | WP_111335634.1                                     |
| <i>Cavenderia fasciculata</i>                | 1054147    | Eukaryota | XP_004359190.1                         | XP_004357271.1                         | XP_004351239.1                                     |
| <i>Crassostrea gigas</i>                     | 29159      | Eukaryota | EKC35799.1                             | XP_011452758.1                         | XP_011415145.1                                     |
| <i>Cutaneotrichosporon oleaginosum</i>       | 879819     | Eukaryota | XP_018274934.1                         | XP_018275936.1                         | XP_018276298.1                                     |
| <i>Caenorhabditis elegans</i>                | 6239       | Eukaryota | NP_498284.1                            | NP_506024.3                            | NP_505450.1                                        |
| <i>Strongyloides ratti</i>                   | 34506      | Eukaryota | XP_024506610.1                         | XP_024508004.1                         | XP_024508314.1                                     |
| <i>Galdieria sulphuraria</i>                 | 130081     | Eukaryota | XP_005705420.1                         | XP_005707814.1                         | XP_005706413.1                                     |
| <i>Danio rerio</i>                           | 7955       | Eukaryota | NP_001096086.1                         | NP_001314753.1                         | NP_001007391.1                                     |
| <i>Scleropages formosus</i>                  | 113540     | Eukaryota | XP_018591176.1                         | XP_018593530.1                         | XP_018621588.1                                     |
| <i>Manacus vitellinus</i>                    | 328815     | Eukaryota | XP_017926887.1                         | XP_008918920.2                         | XP_008931159.1                                     |
| <i>Zonotrichia albicollis</i>                | 44394      | Eukaryota | XP_005486392.1                         | XP_005486991.1                         | XP_005483133.1                                     |
| <i>Taeniopygia guttata</i>                   | 59729      | Eukaryota | XP_002198679.1                         | XP_002192779.1                         | XP_002193125.1                                     |
| <i>Ciona intestinalis</i>                    | 413601     | Eukaryota | XP_002128288.1                         | XP_002131315.1                         | XP_002119902.1                                     |

**Supplementary Table 9. Major water leachable ions and elements from sediments collected in Tekirghiol and Amara Lakes during October 2017.** The reported data are the mean values of three sub-samples analysed in parallel from each sediment sample. Relative expanded measurement uncertainties are indicated in the caption of Supplementary Figure 7.

| <b>Ions/metals<br/>(mg·Kg<sup>-1</sup>)</b> | <b>Tekirghiol<br/>Lake</b> | <b>Amara<br/>Lake</b> |
|---------------------------------------------|----------------------------|-----------------------|
| pH of pore water                            | 7.38                       | 8.03                  |
| Na <sup>+</sup>                             | 16520                      | 7000                  |
| K <sup>+</sup>                              | 1020                       | 221                   |
| Ca <sup>2+</sup>                            | 86.4                       | 640                   |
| Mg <sup>2+</sup>                            | 1100                       | 4000                  |
| Fe*                                         | 0.45                       | 0.38                  |
| Mn*                                         | <0.1                       | 0.57                  |
| Cl <sup>-</sup>                             | 27700                      | 11200                 |
| SO <sub>4</sub> <sup>2-</sup>               | 250                        | 13240                 |

**Note:** Values are determined for the water-extracted fraction of the wet sediment. The asterisk (\*) indicates element total concentration.

## Supplementary References

1. Pruesse, E. *et al.* SILVA: a comprehensive online resource for quality checked and aligned ribosomal RNA sequence data compatible with ARB. *Nucleic Acids Res.* **35**, 7188–7196 (2007).
2. Liu, Y. *et al.* Comparative genomic inference suggests mixotrophic lifestyle for Thorarchaeota. *ISME J.* **12**, 1021–1031 (2018).
3. Zaremba-Niedzwiedzka, K. *et al.* Asgard archaea illuminate the origin of eukaryotic cellular complexity. *Nature* **541**, 353–358 (2017).
4. Tabita, F. R. *et al.* Function, structure, and evolution of the RubisCO-like proteins and their RubisCO homologs. *Microbiol. Mol. Biol. Rev.* **71**, 576–599 (2007).
5. Da Cunha, V., Gaia, M., Nasir, A. & Forterre, P. Asgard archaea do not close the debate about the universal tree of life topology. *PLOS Genet.* **14**, e1007215 (2018).
6. Pushkarev, A. *et al.* A distinct abundant group of microbial rhodopsins discovered using functional metagenomics. *Nature* **558**, 595–599 (2018).
7. Shand, R. F. & Betlach, M. C. bop gene cluster expression in bacteriorhodopsin-overproducing mutants of *Halobacterium halobium*. *J. Bacteriol.* **176**, 1655–1660 (1994).
8. Seitz, K. W., Lazar, C. S., Hinrichs, K.-U., Teske, A. P. & Baker, B. J. Genomic reconstruction of a novel, deeply branched sediment archaeal phylum with pathways for acetogenesis and sulfur reduction. *ISME J.* **10**, 1696–1705 (2016).
9. Ilikchyan, I. N., McKay, R. M. L., Zehr, J. P., Dyhrman, S. T. & Bullerjahn, G. S. Detection and expression of the phosphonate transporter gene *phnD* in marine and freshwater picocyanobacteria. *Environ. Microbiol.* **11**, 1314–1324 (2009).
10. Trautmann, A., Watzer, B., Wilde, A., Forchhammer, K. & Posten, C. Effect of phosphate availability on cyanophycin accumulation in *Synechocystis* sp. PCC 6803 and the production strain BW86. *Algal Res.* **20**, 189–196 (2016).
11. Orita, I. *et al.* The Ribulose Monophosphate Pathway Substitutes for the Missing Pentose Phosphate Pathway in the Archaeon *Thermococcus kodakaraensis*. *J. Bacteriol.* **188**, 4698–4704 (2006).
12. Brasen, C., Esser, D., Rauch, B. & Siebers, B. Carbohydrate metabolism in Archaea: current insights into unusual enzymes and pathways and their regulation. *Microbiol. Mol. Biol. Rev.* **78**, 89–175 (2014).
13. Uwe, S. & J., E. B. The PEP–pyruvate–oxaloacetate node as the switch point for carbon flux distribution in bacteria. *FEMS Microbiol. Rev.* **29**, 765–794 (2006).
14. Tittmann, K., Golbik, R., Ghisla, S. & Hübner, G. Mechanism of Elementary Catalytic Steps of Pyruvate Oxidase from *Lactobacillus plantarum*. *Biochemistry* **39**, 10747–10754 (2000).
15. Kelley, L. A., Mezulis, S., Yates, C. M., Wass, M. N. & Sternberg, M. J. E. The Phyre2 web portal for protein modeling, prediction and analysis. *Nat. Protoc.* **10**, 845–858 (2015).
16. Sousa, F. L., Neukirchen, S., Allen, J. F., Lane, N. & Martin, W. F. Lokiarchaeon is hydrogen dependent. *Nat. Microbiol.* **1**, 16034 (2016).
17. Parks, D. H., Imelfort, M., Skennerton, C. T., Hugenholtz, P. & Tyson, G. W. CheckM: assessing the quality of microbial genomes recovered from isolates, single cells, and metagenomes. *Genome Res.* **25**, 1043–1055 (2015).

18. Berg, I. A. Ecological Aspects of the Distribution of Different Autotrophic CO<sub>2</sub> Fixation Pathways. *Appl. Environ. Microbiol.* **77**, 1925–1936 (2011).
19. Wood, H. G. Life with CO or CO<sub>2</sub> and H<sub>2</sub> as a source of carbon and energy. *FASEB J. Off. Publ. Fed. Am. Soc. Exp. Biol.* **5**, 156–163 (1991).
20. Techtmann, S. M. *et al.* Regulation of Multiple Carbon Monoxide Consumption Pathways in Anaerobic Bacteria. *Front. Microbiol.* **2**, 147 (2011).
21. Ragsdale, S. W. & Pierce, E. Acetogenesis and the Wood-Ljungdahl pathway of CO<sub>2</sub> fixation. *Biochim. Biophys. Acta* **1784**, 1873–1898 (2008).
22. King, G. M. Uptake of carbon monoxide and hydrogen at environmentally relevant concentrations by mycobacteria. *Appl. Environ. Microbiol.* **69**, 7266–7272 (2003).
23. King, G. M. Nitrate-dependent anaerobic carbon monoxide oxidation by aerobic CO-oxidizing bacteria. *FEMS Microbiol. Ecol.* **56**, 1–7 (2006).
24. King, G. M. & Weber, C. F. Distribution, diversity and ecology of aerobic CO-oxidizing bacteria. *Nat. Rev. Microbiol.* **5**, 107–118 (2007).
25. Adam, P. S., Borrel, G. & Gribaldo, S. Evolutionary history of carbon monoxide dehydrogenase/acetyl-CoA synthase, one of the oldest enzymatic complexes. *Proc. Natl. Acad. Sci.* **115**, E1166–E1173 (2018).
26. Ternes, C. M. & Schönknecht, G. Gene Transfers Shaped the Evolution of De Novo NAD(+) Biosynthesis in Eukaryotes. *Genome Biol. Evol.* **6**, 2335–2349 (2014).
27. Nicholls, P., Marshall, D. C., Cooper, C. E. & Wilson, M. T. Sulfide inhibition of and metabolism by cytochrome c oxidase. *Biochem. Soc. Trans.* **41**, 1312–1316 (2013).
28. Jarrell, K. F. & Albers, S.-V. The archaellum: an old motility structure with a new name. *Trends Microbiol.* **20**, 307–312 (2012).
29. Castro-Fernandez, V. *et al.* Reconstructed ancestral enzymes reveal that negative selection drove the evolution of substrate specificity in ADP-dependent kinases. *J. Biol. Chem.* **292**, 21218 (2017).
30. Wrighton, K. C. *et al.* RubisCO of a nucleoside pathway known from Archaea is found in diverse uncultivated phyla in bacteria. *ISME J.* **10**, 2702–2714 (2016).
